# Supplementary material for: Achieving Cycling Stability in Anode of Lithium-Ion Batteries with Silicon-Embedded Titanium Oxynitride Microsphere
Source: MDPI journal article supplement (doi:10.3390/nano13010132), 2022-12-27
Supplement: s1 [file s1]

## Supplementary material

# Achieving Cycling Stability in Anode of Lithium-Ion Batteries with Silicon-Embedded Titanium Oxynitride Microsphere

Sung Eun Wang <sup>1,†</sup>, DoHoon Kim <sup>1,2,†</sup>, Min Ji Kim <sup>1,3</sup>, Jung Hyun Kim <sup>1</sup>, Yun Chan Kang <sup>3</sup>, Kwang Chul Roh <sup>1</sup>, Junghyun Choi <sup>1</sup>, Hyung Woo Lee <sup>2,4,\*</sup> and Dae Soo Jung <sup>1,\*</sup>

<sup>1</sup> Energy Storage Materials Center, Korea Institute of Ceramic Engineering & Technology (KICET), Jinju-si, 52851, Republic of Korea

<sup>2</sup> Department of Nanoenergy Engineering, Pusan National University, Pusan, 46241, Republic of Korea

<sup>3</sup> Department of Materials Science and Engineering, Korea University, Seoul 02841, Republic of Korea

<sup>4</sup> Department of Nano Fusion Engineering and Research Center of Energy Convergence Technology, Pusan University, Pusan, 46241, Republic of Korea

\* Correspondence: dsjung@kicet.re.kr (D.S.J.); lhw2010@pusan.ac.kr (H.W.L.)

† These two authors contributed equally to this work.

**Table S1.** Electrochemical performances of various Si composites applied as anodes for LIBs reported in the previous works.

| Electrode material                         | Preparation method           | Voltage window (V vs Li/Li <sup>+</sup> ) | Initial discharge/charge capacities (mA h g <sup>-1</sup> ) | Reversible capacity (mA h g <sup>-1</sup> ) | Rate capability (mA h g <sup>-1</sup> ) | Ref.      |
|--------------------------------------------|------------------------------|-------------------------------------------|-------------------------------------------------------------|---------------------------------------------|-----------------------------------------|-----------|
| Porous Si microsphere@C                    | Hydrothermal reaction        | 0.01-1.5                                  | 2367/1652 [0.2 A g <sup>-1</sup> ]                          | 1665 (100) [0.2 A g <sup>-1</sup> ]         | 499 [4 A g <sup>-1</sup> ]              | [16]      |
| SiO <sub>x</sub> -TiO <sub>2</sub> @C      | Sol-gel                      | 0.01-2.5                                  | 1618/1011 [0.1 A g <sup>-1</sup> ]                          | 900 (200) [1 A g <sup>-1</sup> ]            | 542 [3.2 A g <sup>-1</sup> ]            | [20]      |
| Nitrogen-rich carbon/Si                    | Hydrothermal reaction        | 0.05-2.0                                  | 2394/1712 [0.1 A g <sup>-1</sup> ]                          | 950 (100) [0.1 A g <sup>-1</sup> ]          | 579 [2 A g <sup>-1</sup> ]              | [49]      |
| Si@graphitized carbon                      | Magnesiothermic co-reduction | 0.005-1.5                                 | 1306/534 [0.1 A g <sup>-1</sup> ]                           | 681 (100) [0.2 A g <sup>-1</sup> ]          | 294 [2 A g <sup>-1</sup> ]              | [50]      |
| Al <sub>2</sub> O <sub>3</sub> coated G/Si | Sol-gel                      | 0.01-1.5                                  | 747/659 [0.05 C]                                            | 530 (100) [0.1 C]                           | -                                       | [51]      |
| Si-TiON (1:1)                              | Spray drying                 | 0.01-1.5                                  | 2076/1663 [0.1 A g <sup>-1</sup> ]                          | 1140 (100) [1 A g <sup>-1</sup> ]           | 603 [5 A g <sup>-1</sup> ]              | This work |

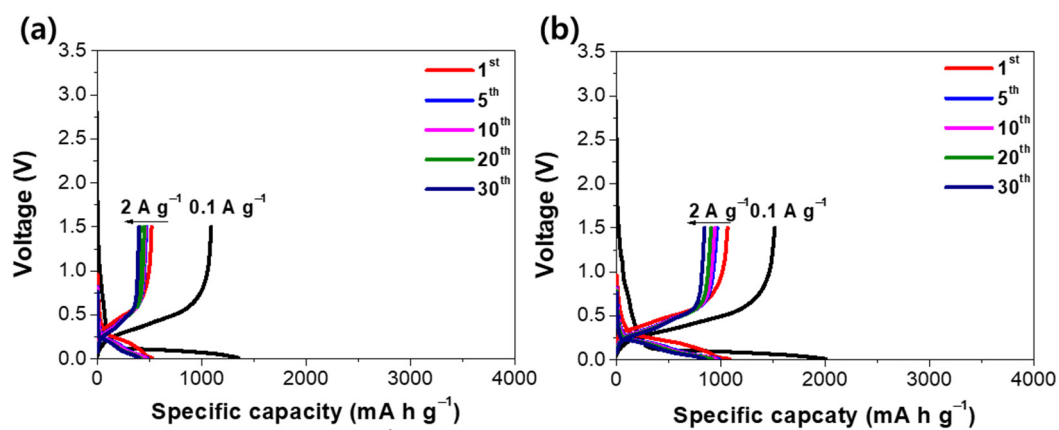

**Figure S1.** Voltage profiles for first and selected subsequent cycles at  $0.1 \text{ A g}^{-1}$  and  $2 \text{ A g}^{-1}$ , respectively: (a) Si-TiON (1:2) and (b) Si-TiO<sub>2</sub> (1:1).

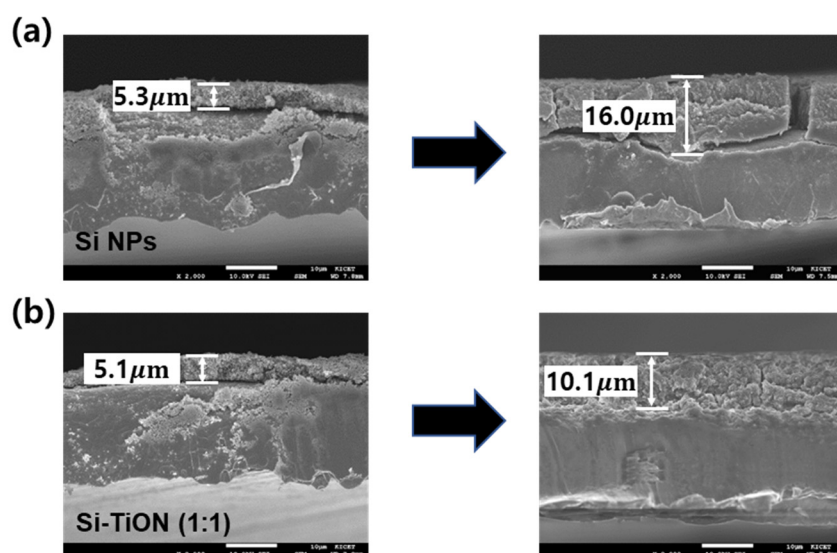

**Figure S2.** Cross-sectional FE-SEM images of (a) Si NPs and (b) Si-TiON (1:1) electrodes before and after 30 cycles at  $2 \text{ A g}^{-1}$ .

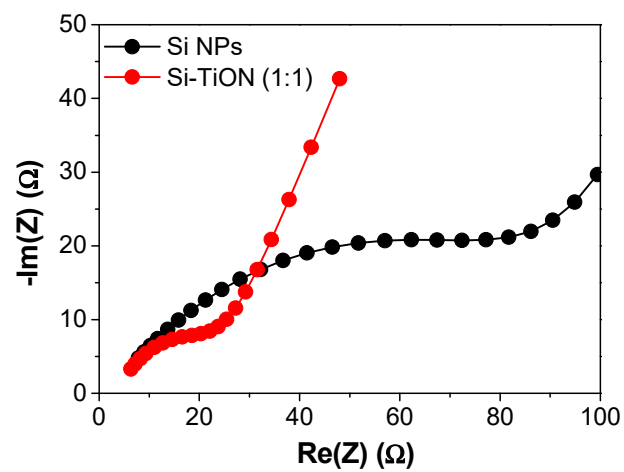

**Figure S3.** EIS profiles of Si NPs and Si-TiON (1:1) electrodes after 100 cycles at  $1 \text{ A g}^{-1}$ .
